# Supplementary material
Source: PubMed Central journal article supplement (PMC4369179)
Supplement: NIHMS630429-supplement-4.pdf [file NIHMS630429-supplement-4.pdf]

**Table S4. Adjusted hazard ratio (95% CI) of incident ESRD using cross-categories of hs-cTnT and NT-proBNP**

| NT-proBNP (pg/mL)                        | hs-cTnT (ng/L)                |                             |                          |
|------------------------------------------|-------------------------------|-----------------------------|--------------------------|
|                                          | Category 1 and 2 ( $\leq 5$ ) | Category 3 and 4 (6-13)     | Category 5 ( $\geq 14$ ) |
| Category 1 and 2 ( $\leq 81.0$ )         | Ref                           | 1.73 $\ddagger$ (1.01-2.97) | 2.17 (1.11-4.23)         |
| Category 3 and 4 (81.0 to $\leq 272.5$ ) | 1.32 (0.70-2.50)              | 2.40 $\dagger$ (1.38-4.15)  | 3.87* (2.10-7.11)        |
| Category 5 ( $>272.5$ )                  | 0.97 (0.29-3.28)              | 3.92* (2.12-7.26)           | 4.53* (2.47-8.30)        |

\*P<0.001

$\dagger$ P<0.01

$\ddagger$ P<0.05
